# Supplementary material
Source: HighWire-hosted journal article supplement (https://bmjopen.bmj.com/content/15/2/e096594)
Supplement: inline-supplementary-material-1 [file inline-supplementary-material-1.pdf]

Supplementary file - Search strategy

|                                                      |                                                            |
|------------------------------------------------------|------------------------------------------------------------|
| 1. Search strategy for MEDLINE (OVID interface)      |                                                            |
| 1. Low back pain                                     | low back pain/                                             |
| 2. Recurrence / Persistence                          | recurren* or remiss* or repeat* or episod* or relapse      |
| 3. Prediction                                        | predict* or prognos* or risk factor* or associat*          |
| 4. Cohort studies                                    | longitudinal or cohort or follow up or prospective         |
| 5.                                                   | 1 and 2 and (3 or 4)                                       |
| 2. Search strategy for EMBASE (OVID interface)       |                                                            |
| 1. Low back pain                                     | low back pain/                                             |
| 2. Recurrence / Persistence                          | (recurren* or remiss* or repeat* or episod* or relapse).mp |
| 3. Prediction                                        | (predict* or prognos* or risk factor* or associat*).mp     |
| 4. Cohort studies                                    | (longitudinal or cohort or follow up or prospective).mp    |
| 5.                                                   | 1 and 2 and 3 and 4                                        |
| 3. Search strategy for APA PsycInfo (OVID interface) |                                                            |
| 1. Low back pain                                     | low back pain/                                             |
| 2. Recurrence / Persistence                          | (recurren* or remiss* or repeat* or episod* or relapse).mp |
| 3. Prediction                                        | (predict* or prognos* or risk factor* or associat*).mp     |
| 4. Cohort studies                                    | (longitudinal or cohort or follow up or prospective).mp    |
| 5.                                                   | 1 and 2 and (3 or 4)                                       |

|                                                                                                                                                                                                                 |                                                                             |
|-----------------------------------------------------------------------------------------------------------------------------------------------------------------------------------------------------------------|-----------------------------------------------------------------------------|
| 4. Search strategy for PubMed                                                                                                                                                                                   |                                                                             |
| 1. Low back pain                                                                                                                                                                                                | low back pain [MesH]                                                        |
| 2. Recurrence / Persistence                                                                                                                                                                                     | recurrence [MeSH] OR recurrent OR remission OR repeat OR episod* OR relapse |
| 3. Prediction                                                                                                                                                                                                   | predict* OR prognosis [MeSH] OR risk factor [MeSH] OR associat*             |
| 4. Cohort studies                                                                                                                                                                                               | longitudinal OR cohort OR follow up OR prospective                          |
| 5.                                                                                                                                                                                                              | #1 AND #2 AND (#3 OR #4)                                                    |
| 5. Search strategy for Cinahl Plus                                                                                                                                                                              |                                                                             |
| 1. Low back pain                                                                                                                                                                                                | (MH "Low Back Pain") OR (MH "Back Pain")                                    |
| 2. Recurrence / Persistence                                                                                                                                                                                     | recurren* OR remiss* OR repeat* OR episod* OR relapse                       |
| 3. Prediction                                                                                                                                                                                                   | predict* OR prognos* OR risk factor* OR associat*                           |
| 4. Cohort studies                                                                                                                                                                                               | longitudinal OR cohort OR follow up OR prospective                          |
| 5.                                                                                                                                                                                                              | S1 AND S2 AND (S3 OR S4)                                                    |
| 6. Search strategy for Web of science                                                                                                                                                                           |                                                                             |
| (((TS=(low back pain)) AND TS=(recurren* OR remiss* OR repeat* OR episod* OR relapse)) AND TS=(predict* OR prognos* OR risk factor* OR associat* )) AND TS=(longitudinal OR cohort OR follow up OR prospective) |                                                                             |

7. Search strategy for Scopus

TITLE-ABS-KEY ( "Low Back Pain" ) AND TITLE-ABS-KEY ( recurren\* OR remiss\* OR repeat\* OR episod\* OR relapse ) AND TITLE-ABS-KEY ( predict\* OR prognos\* OR "risk factor\*" OR "associat\*" ) AND TITLE-ABS-KEY ( longitudinal OR cohort OR "follow up" OR prospective ) AND ( LIMIT-TO ( DOCTYPE , "ar" ) ) AND ( LIMIT-TO ( LANGUAGE , "English" ) )
